## 42     **Abstract**

43     In some chikugunya epidemics, deaths are not fully captured by the traditional  
44     surveillance system, based on case reports and death reports. This is a time series  
45     study to evaluate the excess of mortality associated with epidemic of chikugunya  
46     virus (CHIKV) in Guadeloupe and Martinique, Antilles, 2014. The population (total  
47     784,097 inhabitants) and mortality data estimated by sex and age were accessed at the  
48     Institut National de la Statistique et des Etudes Economiques - France. Age adjusted  
49     mortality rates were calculated also in Reunion, Indian Ocean for comparison.  
50     Epidemiological data on CHIKV (cases, hospitalizations, and deaths) were obtained in  
51     the official epidemiological reports of the Cellule de Institut de Veille Sanitaire -  
52     France. The excess of deaths for each month in 2014 and 2015 was the difference  
53     between the expected and observed deaths for all age groups, considering the 99%  
54     confidence interval threshold. Pearson coefficient of correlation between monthly  
55     excess of deaths and reported cases of chikugunya show a strong correlation ( $R =$   
56      $0.81$ ,  $p < 0.005$ ), also with a 1-month lag ( $R = 0.87$ ,  $p < 0.001$ ), and between monthly  
57     rates of hospitalization for CHIKV and the excess of deaths with a delay of 1 month ( $R =$   
58      $0.87$ ,  $p < 0.0005$ ). The peak of the epidemic occurred in the month with the highest  
59     mortality, returning to normal soon after the end of the CHIKV epidemic. The overall  
60     mortality estimated by this method (639 deaths) was about 4 times greater than that  
61     obtained through death declarations (160 deaths). Excess mortality increased with age.  
62     Although etiological diagnosis of all deaths associated with CHIKV infection is not  
63     possible, already well-known statistical tools can contribute to an evaluation of the  
64     impact of this virus on the mortality and morbidity in the different age groups.

65



the fatality rate in Guadeloupe and Martinique would be respectively 0.04% and 0.06%, practically half of what was observed in Reunion in 2006. In view of the fact that the proportion of elderly population of Reunion Island in 2006 was 9.6% and in Guadeloupe, 15.7% and in Martinique, 17.6%; [14], and also that CHIKV deaths occur at more advanced ages, it would be expected a higher mortality in Martinique and Guadeloupe when compared with Reunion.

In Reunion Island, the excess deaths during the CHIKV epidemic was 267 deceases [15], very close to 255 that was found in the death certificates. Differently from Brazil, Ahmedabad, Andaman and Nicobar Islands (belonging to India) and Mauritius where a significant excess of deaths that did not coincide with deaths reported for epidemiological surveillance system [16–20]. Thus, some inconsistent data on estimated mortality in CHIK circulation regions have been reported.

The objective of this study was to assess the excess mortality by sex and age group in the French overseas departments of the Caribbean, Guadeloupe and Martinique, during the 2014 epidemic year of CHIKV using the official data from the Institut National de La Statistique et des Etudes Economiques (INSEE). We also compare results with official data on the 2005-2006 epidemic on Reunion Island. Our hypothesis is that there may have been an excess of deaths above that identified by death certificates.

## Methods

A time series study of reported incidence rates of CHIKV and mortality by sex and age group was conducted in Guadeloupe and Martinique, in the period between 2011 and 2015.

## Locality

Guadeloupe and Martinique are French overseas departments in the Caribbean, are set of islands of tropical climate (Af, according with Köppen Climate Classification System) located in

the Lesser Antilles of the French West Indies, with populations of 400,186 and 383,911 inhabitants in 2014, respectively [14]. We analyzed the two French overseas departments together because they had a similar climate, epidemiological and sociodemographic profile, and the CHIKV epidemic was practically simultaneous in both territories [13].

## **Data collect**

The population data estimated by sex and age group, and mortality data were accessed at the INSEE of the French government [21]. Epidemiological data on CHIKV as number of cases, hospitalizations and deaths were obtained in the official epidemiological reports of the Cellule de l'Institut de Veille Sanitaire (l'InVS) en Region of the Government of France [13]. Mortality data during the 2006 epidemic in Reunion were retrieved through literature [8] based on official surveillance [3]. As the influenza virus is known to be a cause of seasonal increase in overall mortality, we also collect monthly data from sentinel surveillance of influenza-like syndrome in the bulletins de l'InVS [22,23]. Numerical data were extracted from the graphs of bulletins using the program Engauge Digitizer[24].

## **Statistical analysis**

The monthly number of deaths expected for 2014 and 2015 by age group and sex was calculated by applying the average mortality rates per month of the reference period for the estimated population of the French departments of Guadeloupe and Martinique in 2014 and 2015. The reference period used was three years prior to 2013. The excess of deaths for each month in 2014 and 2015 was calculated as the difference between the monthly expected deaths for all age groups and the total deaths observed per month. The conservative confidence interval of 99% of the monthly number of deaths was also calculated. The excess of obits were also calculated for the whole years 2014 and for each age group and sex. The excess age-standardized death rates (ASMR) were calculated for the year 2014 by the direct method

138 using the formula below (formula 1) using the WHO standard population and the excess of  
139 deaths by age group of 2014 [25].

140 Formula 1:

141 Age-standardized mortality rate = 
$$\frac{\sum (P_k m_k)}{\sum P_k}$$

142  $P_k$  = Standard population in sex/age group k

143  $m_k$  = Mortality rate (deaths per 100,000 persons) in sex/age group

144  $k$  = age/sex group

145

146 The mortality rate by age group for the whole year 2006 of Reunion Island was estimated by  
147 extrapolating the mortality rate observed in the period from January to April [3] for deaths  
148 observed throughout the year 2006 [8] assuming the same proportion of deaths by age group.  
149 Statistical analyzes were performed using the IBM® SPSS® 24.0 software.

## 150 **Results**

### 151 **CHIKV epidemic curve and monthly mortality**

152 The monthly reported cases of CHIKV, the number of hospitalizations and excess deaths in  
153 2014 in the departments of Guadeloupe and Martinique diagnosed by sentinel doctors is  
154 presented in Table 1. We also show the estimates made by InVS of clinical cases of CHIKV, in  
155 Guadeloupe and Martinique in the year 2014. There was a strong correlation between the  
156 monthly incidence rates of CHIKV and the excess of deaths ( $R = 0.81$ ,  $p < 0.005$ ), and ever  
157 higher with a 1-month lag between the CHIKV cases and the excess of deaths ( $R = 0.87$ ,  $p$   
158  $< 0.001$ , Table1). We observed a strong correlation between the monthly rates of

159 hospitalization for CHIKV and the excess of deaths with a delay of 1 month ( $R = 0.87$ ,  $p$   
160  $<0.0005$ ) while a moderate correlation was found between the monthly hospitalization rates  
161 and the excess of deaths ( $R = 0.66$ ,  $p <0.05$ ) (Table1)..

162 Figure 1 shows the number of deaths expected and observed per month, above the upper limit  
163 of the 99% confidence interval in Guadeloupe and Martinique. We also present the 99%  
164 confidence interval and the number of monthly cases of CHIKV estimated by InVS. The peak of  
165 the epidemic was in June, as was the month in which the highest number of deaths occurred.  
166 Deaths remained above the 99% confidence interval in the months of April to November  
167 period of highest incidence of CHIKV. In the months with a small number of cases of CHIKV in  
168 2014 (January to March and December) and in 2015 the number of monthly deaths per CHIKV  
169 was below the upper limit of the 99% confidence interval.

170

#### 171 **Mortality by sex and age group**

172 Except for the under-19 age group, all others had a higher number of deaths than expected.  
173 ASMR was above the upper limit of the 99% confidence interval in all age groups over 20 years  
174 of age, with the exception of the age range between 40 and 59 years (Table 2); the same  
175 pattern was observed in both sexes (Figure 2). the excess mortality The excess of deaths  
176 increased with age in both sexes. The values found for the excess ASMR in Guadeloupe and  
177 Martinique were not very different from the ASMR CHIKV observed in Reunion Island in 2006,  
178 estimated using death certificates (Table 2). In the year 2015, ASMR were lower than observed  
179 in 2014 and were below the upper limit of the confidence interval in all age groups.

#### 180 **Excess mortality, age-adjusted mortality rate and fatality rate**

181 During 2014 in Guadeloupe and Martinique there was 639 deaths more than expected  
182 resulting in an excess mortality rate of 81.5 deaths per 100,000 inhabitants, 4 times greater

183 than that reported to InVS through death certificates, and 2.5 times greater than observed in  
184 Reunion in 2006. The excess mortality adjusted by WHO standard age (world average 2000-  
185 2025) was 32.2 deaths per 100,000 population (Table 2) very close to that observed in  
186 Reunion in 2006 (32.7 deaths per 100,000 population ). The fatality rate in 2014 was 2.08  
187 deaths per 1,000 cases of CHIKV (Table 2), practically twice that registered in 2006 in Reunion  
188 (0.96 deaths per 1,000 cases of CHIKV). These differences are probably due to the fact that the  
189 proportion of older people in the French Antilles in 2014 was higher than in the Reunion Island  
190 in 2006.

## 191 Discussion

192 The time series analysis of deaths in the Guadeloupe and Martinique departments shows that  
193 the standardized mortality rate increased above the 99% confidence interval during the CHIKV  
194 epidemic of 2014, rates returning to normal soon after the end of the epidemic. The peak of  
195 deaths occurred in June, simultaneous with the peak of CHIKV cases. There was a strong  
196 temporal correlation between the occurrence of excess deaths, cases of CHIKV and  
197 hospitalization. This correlation was stronger when we used 1 month of delay between deaths  
198 for the occurrence of clinical cases and hospitalizations. This lag between the occurrence of the  
199 clinically identified cases and the deaths is compatible with long periods of hospitalization  
200 observed as consequence of clinical complications, especially among the elderly with prevalent  
201 chronic diseases [26]. Correlation between monthly hospitalization rates and the excess of  
202 deaths reinforces this hypothesis. Excess mortality increased with age, but there were excess  
203 deaths in the age groups of 20 to 39 years, being above the upper limit of the 99% confidence  
204 interval. This same mortality pattern was observed in studies that analyzed the CHIKV cause or  
205 cause of death as reported in the certificates [3] and in studies that used laboratory test results  
206 (RT-PCR, viral isolation or IgM) to confirm the disease [4,7]. The excess mortality rate by age  
207 group in the Guadeloupe and Martinique in 2014 (Table 2) was very close to the specific



208 mortality by CHIKV observed in Reunion in 2006, considering the declarations of deaths [3,8].  
 209 These findings reinforce our hypothesis that increased mortality was a consequence of the  
 210 CHIKV epidemic.

211 There was no positive correlation between the increase in deaths and circulation of influenza  
 212 virus, another frequent cause of increase in overall mortality. There were no other phenomena  
 213 in these islands that could be related to an increase in mortality in this period. An epidemic of  
 214 dengue that began in mid-2013 ended on March 2, 2014 in Guadeloupe and on April 20, 2014  
 215 in Martinique [27], and apparently there was no significant circulation of other arboviruses.

216 A total of 639 excess deaths were associated with this CHIKV epidemic, 4 times higher than the  
 217 number of death certificates that mentioned CHIKV as cause. In the 2006 Reunion epidemic  
 218 the estimated excess was very similar to the number of deaths in which there was mention of  
 219 CHIKV in the death certificates as the basic cause or contributing cause [8,15]. Perhaps the fact  
 220 that it was the first major epidemic in French territory, the etiologic investigation and the  
 221 detailing in the preparation of the certificate of obit have been made more carefully by the  
 222 health professionals. Recent studies carried out in the Antilles have shown that the elderly  
 223 present an acute clinical picture different from the younger ones and this may help to explain,  
 224 at least partially, the difficulty in the etiological diagnosis of the deaths in elder during the  
 225 CHIKV lack of knowledge of the severe forms of CHIKV that may present complications of a  
 226 very diverse nature such as myocarditis, arrhythmias, hepatitis and encephalitis [4,28].  
 227 Another reason that may hamper the attribution of death to CHIKV is the fact that many  
 228 patients may die as a consequence of exacerbation of underlying diseases, such as  
 229 cardiovascular diseases [4]. Although some researchers still considers that the deaths caused  
 230 by CHIKV are rare [29], data from Martinique and Guadalupe departments suggest the  
 231 opposite. This lack of consensus on the ability of the CHIKV lead to death may conduct doctors  
 232 not to attribute a death to the CHIKV causing this underreporting as observed in our study.

233 Considering that the InVS estimated the number of cases of symptomatic patients at 307,400,  
 234 the estimated lethality was 2 deaths per 1,000 cases, 10 times higher than that reported by all  
 235 the countries that make up the PAHO in the year 2014 [11]. In 2006 the fatality rate attributed  
 236 to CHIKV in the Reunion Island was 1 deaths for 1,000 CHIKV cases, half of this rate was  
 237 observed in the Antilles in 2014. This divergence probably was due to the difference in the age  
 238 profile since the proportion of elderly people in the Antilles in 2014 was higher than in the  
 239 Reunion in 2006 [8]. Published study evaluating excess mortality in India in 2006 raised the  
 240 hypothesis that deaths could be linked to increased virulence related to mutations in the  
 241 East/Central /South African (ECSA) lineage of the CHIKV [17]. Our findings suggest that the  
 242 Antillean epidemic in 2014, caused by a CHIKV of the Asian lineage, had a mortality by age  
 243 group very close to that observed in the 2006 Reunion epidemic, that were caused by the ECSA  
 244 lineage.

245 The main limitation of this study is associated with the design that is based on a temporal  
 246 series of deaths, with no etiological definition. Other phenomena may have been responsible  
 247 for this increase in overall mortality in Guadeloupe and Martinique. However, the temporal  
 248 pattern and age of the deaths are very similar to those found in epidemics that occurred in  
 249 other localities in which laboratory criteria were used to confirm cases. Our results are  
 250 compatible with the association of CHIKV transmission with excess of mortality with higher  
 251 impact in the elderly. The lack of etiological diagnosis of the infection may not mean that the  
 252 disease does not increase risk of death. A situation of this nature occurs with influenza in  
 253 which only a small part of the deaths is diagnosed as such. Most influenza-related deaths  
 254 result from secondary bacterial pneumonia or from decompensation of underlying diseases  
 255 caused by viral infection and death is not classified as due to influenza, thus, the impact of  
 256 influenza on mortality is estimated by assessing the excess of influenza mortality [30,31]. Using  
 257 similar criteria of present work the excess of deaths caused by influenza among those over 65  
 258 years is 73 deaths per 100,000 per year [30], with a simple calculation with the data of the

259 present study we conclude that the excess of deaths associated with a CHIKV epidemic is 324  
260 per 100,000 inhabitants over 60 years or 4.4 times higher than the annual average of mortality  
261 associated with influenza[30].

262 Mortality and fatality are very expressive indicators for assessing disease burden and  
263 important for use in prioritizing public health, including vaccine production. Official documents  
264 have placed CHIK as a disease less lethal than dengue, stating that deaths are rare [32]. Studies  
265 in Reunion Island and Ahmedabad have shown that a significant proportion of deaths occurred  
266 in patients with relatively common and non-severe conditions such as high blood pressure and  
267 diabetes, and even without underlying diseases [4,7].

268 Between 2004 and 2015, in Guadeloupe and Martinique 49 deaths was attributed to dengue  
269 and 17,1550 cases was estimated resulting in a fatality rate of 0.29 deaths per 1,000 cases [27].  
270 According to official data from the InVS, that considers death certificates, the number of  
271 deaths per CHIKV in Guadeloupe and Martinique in a single year is 3.3 times higher (160  
272 deaths) than the accumulated dengue in 10 years and fatality rate almost twice as high (0.52  
273 deaths per 1,000 cases). Using the excess mortality criteria, the mortality associated with the  
274 CHIKV epidemic in a single year would be 13 times greater than that accumulated in 10 years  
275 of dengue epidemics in the same locality, and the fatality rate would be 7.7 times greater than  
276 dengue. Although it is not possible to make the etiological diagnosis of all the cases of deaths  
277 associated with CHIKV infection, already well-known statistical tools can contribute to an  
278 evaluation of the impact of this virus on the mortality in the different age groups, as in the  
279 deaths caused by extreme weather phenomena, seasonal and pandemic influenza[31,33,34].

280 Knowledge of the actual potential for morbidity and mortality of an epidemic viral infection  
281 such as CHIKV and the most vulnerable groups may help health professionals during  
282 epidemics.

283

284 Table 1 - Monthly cases of chikungunya, influenza like illness and excess deaths (Guadeloupe  
285 and Martinique, 2014)

286

287 Table 2 - Mortality data, observed and estimated in Guadeloupe and Martinique (2014) and  
288 observed in Reunion Islands (2006). (ASMR: Age-Specific Mortality Rate)

289

290 Figure 1 - Cases of chikungunya, expected, observed monthly deaths and upper limit 99%  
291 confidence interval (Guadeloupe and Martinique 2014-2015)

292 Figure 2 - Excess deaths and mortality rate by sex and age group (Guadeloupe and Martinique,  
293 2014)

## 294 References

- 295 1. **European Centre for Disease Prevention and Control.** *RAPID RISK ASSESSMENT*  
296 *- Clusters of autochthonous chikungunya cases in Italy.* ECDC. Stockholm, 2017.
- 297 2. **Weaver SC, Forrester NL.** Chikungunya: Evolutionary history and recent  
298 epidemic spread. *Antiviral Research* 2015; **120**: 32–39.
- 299 3. **Renault P, et al.** A Major Epidemic of Chikungunya Virus Infection on Reunion  
300 Island, France, 2005-2006. *American Journal of Tropical Medicine and Hygiene*  
301 2007; **77**: 727–731.
- 302 4. **Economopoulou A, et al.** Atypical Chikungunya virus infections: clinical  
303 manifestations, mortality and risk factors for severe disease during the 2005-  
304 2006 outbreak on Reunion. *Epidemiology and infection* 2009; **137**: 534–41.
- 305 5. **Cardona-Ospina JA, et al.** Mortality and fatality due to Chikungunya virus  
306 infection in Colombia. *Journal of Clinical Virology* 2015; **70**: 14–15.
- 307 6. **Casolari S, et al.** A fatal case of encephalitis associated with Chikungunya virus  
308 infection. *Scandinavian Journal of Infectious Diseases* 2008; **40**: 995–6.
- 309 7. **Tandale B V, et al.** Systemic involvements and fatalities during Chikungunya  
310 epidemic in India, 2006. *Journal of Clinical Virology* 2009; **46**: 145–9.
- 311 8. **Renault P, et al.** L'épidémie de chikungunya à La Reunion et à Mayotte, France,  
312 2005-2006: le contexte et les questions de surveillance et d'évaluation posées.  
313 *Bulletin Epidemiologique Hebdomadaire - Thematique* 2008; **21**: 343–346.
- 314 9. **Sá PK de O, et al.** Chikungunya virus infection with severe neurologic  
315 manifestations: report of four fatal cases. *Revista da Sociedade Brasileira de*  
316 *Medicina Tropical SBMT*, 2017; **50**: 265–268.
- 317 10. **Cauchemez S, et al.** Local and regional spread of chikungunya fever in the  
318 Americas. *Euro Surveillance* 2014; **19**: 6–13.
- 319 11. **Pan American Health Organization.** *54th DIRECTING COUNCIL REPORT ON*  
320 *CHIKUNGUNYA VIRUS TRANSMISSION AND ITS IMPACT IN THE REGION OF THE*  
321 *AMERICAS.* Washington, D.C., 2015.
- 322 12. **Farraudière L, et al.** First detection of dengue and chikungunya viruses in  
323 natural populations of *Aedes aegypti* in Martinique during the 2013 – 2015  
324 concomitant outbreak. *Revista Panamericana de Salud Pública* 2017; **41**: 1–3.
- 325 13. **Cellule de le Intitut de Veille Sanitaire en region - CIRE - Antilles Guyane.** Le  
326 chikungunya aux Antilles. *Le point epidemiologique* 2015; **2**: 1–3.

- 327 14. **Institut national de la Statistique et des Etudes Economiques - INSEE.**  
328 *Estimations de population - Pyramides des âges. Institut national de la*  
329 *statistique et des etudes economiques.*  
330 2017(<https://www.insee.fr/fr/statistiques/2418110>). Accessed 30 September  
331 2017.
- 332 15. **Josseran L, et al.** Description des fluctuations de la mortalite reunionnaise dans  
333 le contexte de l'epidemie de chikungunya en 2005-2006. *Bulletin*  
334 *Epidemiologique Hebdomadaire - Thematique* 2008; **21**: 353–357.
- 335 16. **Manimunda SP, et al.** Chikungunya epidemic-related mortality. *Epidemiology &*  
336 *Infection* Cambridge University Press, 2011; **139**: 1410–2.
- 337 17. **Mavalankar D, et al.** Increased Mortality Rate Associated with Chikungunya  
338 Epidemic, Ahmedabad, India. *Emerging Infectious Diseases* 2008; **14**: 412–415.
- 339 18. **Beesoon S, et al.** Chikungunya Fever, Mauritius, 2006. *Emerging Infectious*  
340 *Disease* 2008; **14**: 337–338.
- 341 19. **Freitas ARR, et al.** Excess Mortality Related To Chikungunya Epidemics In The  
342 Context Of Co-circulation Of Other Arboviruses In Brazil. *bioRxiv* Cold Spring  
343 Harbor Laboratory, 2017; : 140491.
- 344 20. **Brito ACA, Teixeira MG.** Increased number of deaths during a chikungunya  
345 epidemic in Pernambuco, Brazil. *Memorias do Instituto Oswaldo Cruz* 2017; **112**:  
346 650–651.
- 347 21. **Institut national de la statistique et des etudes economiques. L'Insee.**  
348 2017(<https://www.insee.fr/fr/statistiques?theme=0>). Accessed 12 September  
349 2017.
- 350 22. **Cellule de le Intitut de Veille Sanitaire en region - CIRE - Antilles Guyane.**  
351 Surveillance de la grippe Bulletin periodique: S201517 à 2015-19 (Guadeloupe).  
352 *Le Point Epidemiologique* 2015; **2015**: 1–2.
- 353 23. **Cellule de le Intitut de Veille Sanitaire en region - CIRE - Antilles Guyane.**  
354 Surveillance de la grippe - Bulletin periodique: S2015-13 à S2015-16  
355 (Martinique). *Le Point Epidemiologique* 2015; **2015**: 1–2.
- 356 24. **Mitchell M, et al.** *Markummitchell/Engauge-Digitizer: Version 10.3.* 2017.
- 357 25. **Ahmad OB, et al.** *AGE STANDARDIZATION OF RATES: A NEW WHO STANDARD.*  
358 Geneva, 2001. Report No.: 31.
- 359 26. **Crosby L, et al.** Severe manifestations of chikungunya virus in critically ill  
360 patients during the 2013–2014 Caribbean outbreak. *International Journal of*  
361 *Infectious Diseases* 2016; **48**: 78–80.

- 362 27. **Cellule de le Intitut de Veille Sanitaire en region - CIRE - Antilles Guyane.** Bilan  
363 des epidemies de dengue aux Antilles-Guyane de 2012 à 2014. *Bulletin de Veille*  
364 *Sanitaire* 2015; **2015**: 1–29.
- 365 28. **Gerardin P, et al.** Chikungunya virus-associated encephalitis: A cohort study on  
366 La Reunion Island, 2005-2009. *Neurology* 2016; **86**: 94–102.
- 367 29. **Rajapakse S, Rodrigo C, Rajapakse A.** Atypical manifestations of chikungunya  
368 infection. *Transactions of the Royal Society of Tropical Medicine and Hygiene*  
369 2010; **104**: 89–96.
- 370 30. **Simonsen L.** The global impact of influenza on morbidity and mortality. *Vaccine*  
371 1999; **17**: S3-10.
- 372 31. **Nielsen J, et al.** Pooling European all-cause mortality: methodology and findings  
373 for the seasons 2008/2009 to 2010/2011. *Epidemiology & Infection* 2012; : 1–15.
- 374 32. **Centers for Disesease Control and Prevention.** *CHIKUNGUNYA Clinical*  
375 *management in dengue-endemic areas*. Atlanta, 2017.
- 376 33. **Hoshiko S, et al.** A simple method for estimating excess mortality due to heat  
377 waves, as applied to the 2006 California heat wave. *International Journal of*  
378 *Public Health* 2010; **55**: 133–137.
- 379 34. **Freitas ARR, Francisco PMSB, Donalisio MR.** Mortality Associated with Influenza  
380 in Tropics, State of São Paulo, Brazil, from 2002 to 2011: The Pre-Pandemic,  
381 Pandemic, and Post-Pandemic Periods. *Influenza Research and Treatment* 2013;  
382 **2013**: 1–9.
- 383
- 384

**Figure 1- Cases of chikungunya, expected, observed monthly deaths and upper limit 99% confidence interval (Guadeloupe and Martinique 2014-2015)**

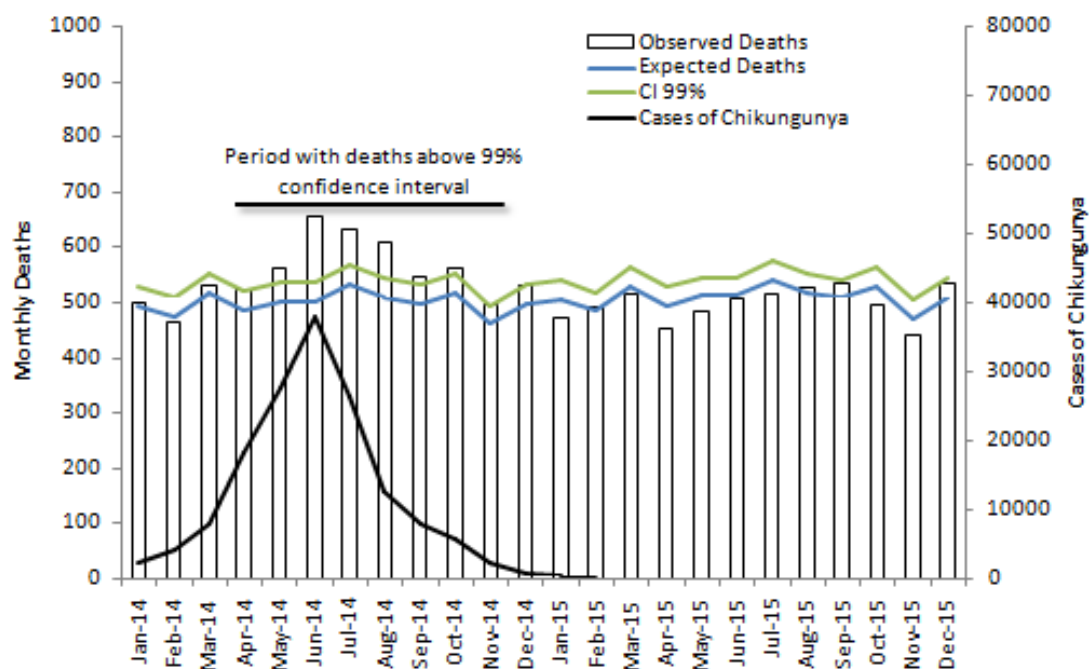

385



**Figure 2 - Excess deaths and mortality rate by sex and age group (Guadeloupe and Martinique, 2014)**

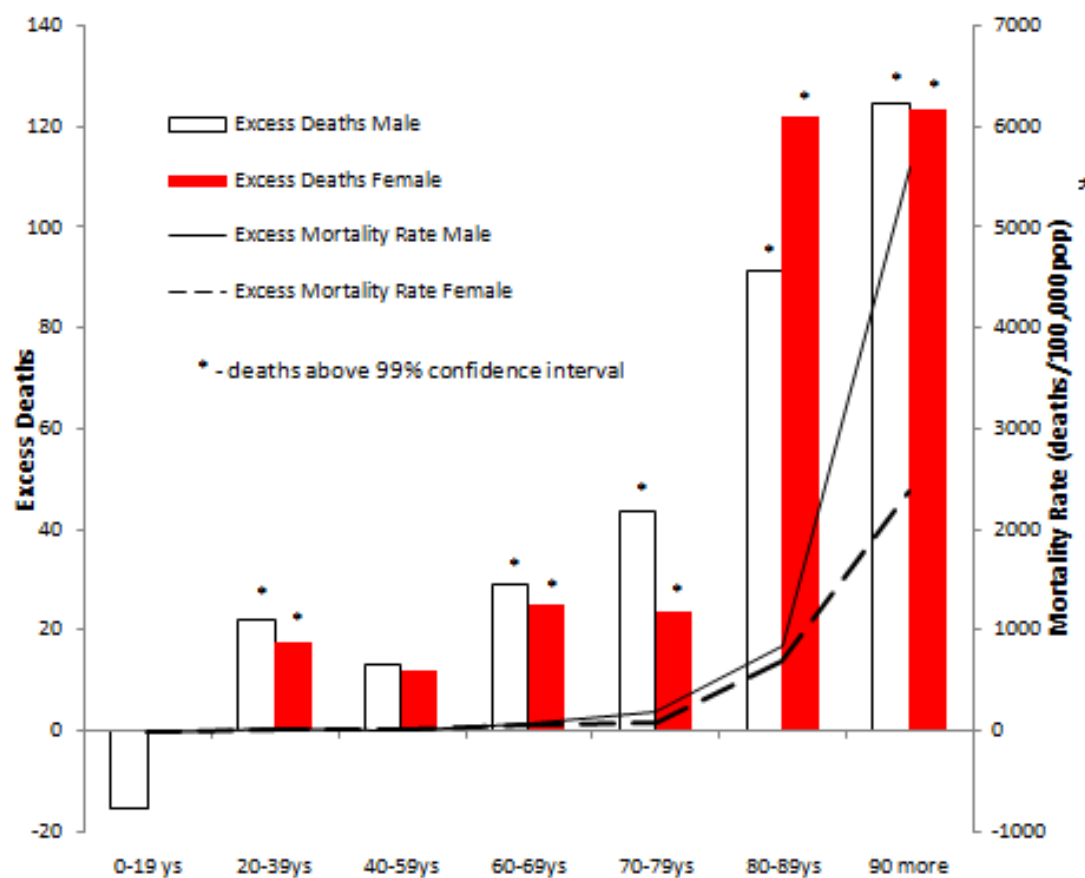

**Table 1 - Monthly cases of chikungunya, influenza like illness and excess deaths (Guadeloupe and Martinique, 2014)**

|                                                                        |                |   | Chikungunya<br>Cases<br>(clinically<br>diagnosed -<br>sentinel<br>physicians) | Total of<br>Estimated<br>Chikungnuya<br>Clinical<br>Cases | Hospitalization | Influenza Like<br>Illness<br>(sentinel<br>surveillance) | Excess<br>deaths |
|------------------------------------------------------------------------|----------------|---|-------------------------------------------------------------------------------|-----------------------------------------------------------|-----------------|---------------------------------------------------------|------------------|
| jan                                                                    |                |   | 2,161                                                                         | 4,322                                                     | 65              | 5,608                                                   | 5                |
| fev                                                                    |                |   | 4,102                                                                         | 8,204                                                     | 101             | 5,475                                                   | -12              |
| mar                                                                    |                |   | 7,924                                                                         | 15,848                                                    | 138             | 5,136                                                   | 13               |
| abr                                                                    |                |   | 18,254                                                                        | 36,508                                                    | 258             | 3,260                                                   | <u>40</u>        |
| mai                                                                    |                |   | 27,471                                                                        | 54,942                                                    | 323             | 897                                                     | <u>61</u>        |
| jun                                                                    |                |   | 37,936                                                                        | 75,871                                                    | 315             | 816                                                     | <u>159</u>       |
| jul                                                                    |                |   | 26,197                                                                        | 52,395                                                    | 260             | 610                                                     | <u>105</u>       |
| ago                                                                    |                |   | 12,716                                                                        | 25,432                                                    | 198             | 570                                                     | <u>105</u>       |
| set                                                                    |                |   | 7,891                                                                         | 15,782                                                    | 125             | 743                                                     | <u>49</u>        |
| out                                                                    |                |   | 5,871                                                                         | 11,742                                                    | 59              | 1,983                                                   | <u>47</u>        |
| nov                                                                    |                |   | 2,326                                                                         | 4,652                                                     | 37              | 1,857                                                   | <u>36</u>        |
| dez                                                                    |                |   | 851                                                                           | 1,702                                                     | 10              | 1,547                                                   | 31               |
| Total                                                                  |                |   | 153,700                                                                       | 307,400                                                   | 1,888           |                                                         | 639              |
| Correlati<br>on<br>(Pearson<br>) with<br>monthly<br>excess of<br>death | without<br>lag | R |                                                                               | 0.806                                                     | 0.664           | -0.76*                                                  |                  |
|                                                                        |                | p |                                                                               | <0.005                                                    | <0.05           | <0.005                                                  |                  |
|                                                                        | 1 month<br>lag | R |                                                                               | 0.868                                                     | 0.872           | -0.66*                                                  |                  |
|                                                                        |                | p |                                                                               | <0.001                                                    | <0.0005         | <0.05                                                   |                  |
|                                                                        | 2 month<br>lag | R |                                                                               | 0.639                                                     | 0.763           | -0.197                                                  |                  |
|                                                                        |                | p |                                                                               | <0.05                                                     | <0.05           | 0.586                                                   |                  |

\* Without biological plausibility

**Table 2 - Mortality data, observed and estimated in Guadeloupe and Martinique (2014) and observed in Reunion Islands (2006).  
(ASMR: Age-Specific Mortality Rate)**

| Population by age group (2014)          | Observed deaths (2014) [1] | Expected deaths (2014) [2] | Observed ASMR for 2014 [1] | Observed ASMR for 2015 | Upper Limit 99% CI | ASMR, mean (2011-2013) [2] | Excess deaths | Official data of chikungunya deaths* (Guadeloupe and Martinique, 2014) | Excess mortality rate (Guadeloupe and Martinique, 2014 ) ([1]-[2]) | Chikungunya Mortality Rate* (Reunión, until april 2006) | Chikungunya Mortality Rate* (Reunión, 2006) |
|-----------------------------------------|----------------------------|----------------------------|----------------------------|------------------------|--------------------|----------------------------|---------------|------------------------------------------------------------------------|--------------------------------------------------------------------|---------------------------------------------------------|---------------------------------------------|
| 0 - 19 years                            | 154,092                    | 109                        | 124                        | 70.7                   | 67.8               | 91.0                       | 80.5          | -15                                                                    | -9.7                                                               | 0.7                                                     | 0.9                                         |
| 20 - 39 years                           | 159,195                    | 200                        | 160                        | <u>125.6</u>           | 109.8              | 111.8                      | 100.5         | <u>40</u>                                                              | <u>25.1</u>                                                        | 2.1                                                     | 2.7                                         |
| 40 - 59 years                           | 291,942                    | 764                        | 733                        | 261.7                  | 258.2              | 264.8                      | 251.1         | 31                                                                     | 10.6                                                               | 13.8                                                    | 17.3                                        |
| 60 - 69 years                           | 88,272                     | 816                        | 764                        | <u>924.4</u>           | 822.2              | 913.1                      | 865.1         | <u>52</u>                                                              | <u>59.3</u>                                                        | 62.9                                                    | 79.0                                        |
| 70 - 79 years                           | 54,894                     | 1,233                      | 1,163                      | <u>2,246.1</u>         | 1,984.1            | 2,212.9                    | 2,119.4       | <u>70</u>                                                              | <u>126.8</u>                                                       | 171.9                                                   | 216.0                                       |
| 80 - 89 years                           | 28,275                     | 1,949                      | 1,735                      | <u>6,893.0</u>         | 5,664.5            | 6,359.4                    | 6,136.6       | <u>214</u>                                                             | <u>756.4</u>                                                       | 628.8                                                   | 789.8                                       |
| 90 more                                 | 7,427                      | 1,538                      | 1,291                      | <u>20,708.2</u>        | 16,841.6           | 18,124.8                   | 17,378.1      | <u>247</u>                                                             | <u>3,330.1</u>                                                     | 1,489.6                                                 | 1,871.1                                     |
| Total                                   | 784,097                    | 6,609                      | 5,970                      |                        |                    |                            | 639           | 160                                                                    |                                                                    | 203                                                     | 255                                         |
| Total of chikungunya cases              |                            |                            |                            |                        |                    |                            |               | 307,400                                                                |                                                                    |                                                         | 266,000                                     |
| Crude mortality rate                    |                            |                            |                            |                        |                    |                            | 81.5          | 20.4                                                                   |                                                                    | 81.5                                                    | 32.5                                        |
| Age Adjusted Mortality Rate             |                            |                            |                            |                        |                    |                            |               |                                                                        |                                                                    |                                                         | 32.7                                        |
| Case Fatality Rate (deaths/1,000 cases) |                            |                            |                            |                        |                    |                            |               | 0.52                                                                   |                                                                    | 2.08                                                    | 0.96                                        |

\* According to the death certificate listing chikungunya as a cause or contributing condition to death

Age group that deaths were above upper 99% confidence interval
